# Supplementary material for: A new common functional coding variant at the DDC gene change renal enzyme activity and modify renal dopamine function
Source: PubMed Central journal article supplement (PMC6433864; doi:10.1038/s41598-019-41504-7), 2019-03-25
Supplement: 41598_2019_41504_MOESM1_ESM.pdf [file 41598_2019_41504_MOESM1_ESM.pdf]

# **A new common functional coding variant at the DDC gene change renal enzyme activity and modify renal dopamine function**

Jose Pablo Miramontes-Gonzalez MD/PhD<sup>1,3,5</sup>, Makena Hightower PhD<sup>1</sup>, Kuixing Zhang MD/PhD<sup>1,3</sup>, Hiroki Kurosaki BS<sup>2</sup>, Andrew J. Schork PhD<sup>1</sup> Nilima Biswas PhD<sup>1,3</sup>, Sucheta Vaingankar<sup>1,3</sup>, Manjula Mahata PhD<sup>1,3</sup>, Michael S. Lipkowitz MD<sup>4</sup>, Caroline M. Nievergelt PhD<sup>1</sup>, Dewleen G. Baker MD<sup>1,3</sup>, Michael G. Ziegler MD<sup>1</sup>, David León Jiménez MD<sup>2</sup>, Rogelio González Sarmiento MD PhD<sup>1,5</sup>, Hiroshi Ichinose PhD<sup>2</sup>, Daniel T. O'Connor MD<sup>1,3\*</sup>.

From

1. Departments of Medicine, Pharmacology, Psychiatry, and Institute for Genomic Medicine, University of California at San Diego, La Jolla, CA, USA.
2. Department of Life Science, Graduate School of Bioscience and Biotechnology, Tokyo Institute of Technology, Yokohama, Japan.
3. VA San Diego Healthcare System, La Jolla, CA. Department of Medicine,
4. Georgetown University, Washington, DC. USA
5. Hospital Universitario de Salamanca. Instituto de Investigación Biomedical de Salamanca (IBSAL). Salamanca, Spain.

\*Professor Danniell T. O'Connor: Deceased

Key words: Dopamine, DOPA, DOPA decarboxylase, twin, heredity.

Address for correspondence:

J. Pablo Miramontes González, [jpmiramontes@hotmail.com](mailto:jpmiramontes@hotmail.com).

Internal Medicine Unit. Hospital Universitario de Salamanca. Instituto de Investigación Biomedical de Salamanca (IBSAL).

## SUPPLEMENTAL FIGURES AND LEGENDS.

**Supplemental Figure 1. Haplotype blocks across the *DDC* locus: Results from HapMap.** LD marker-on-marker map and haplotype blocks were constructed from CEU (European ancestry) data at <www.HapMap.org>. The color scheme (white → pink → red) represents increasing value of LD, with maximum  $D'$  in bright red.

### *DDC* (*AADC*; DOPA decarboxylase) on chr 7p12.2: LD structure at HapMap.org

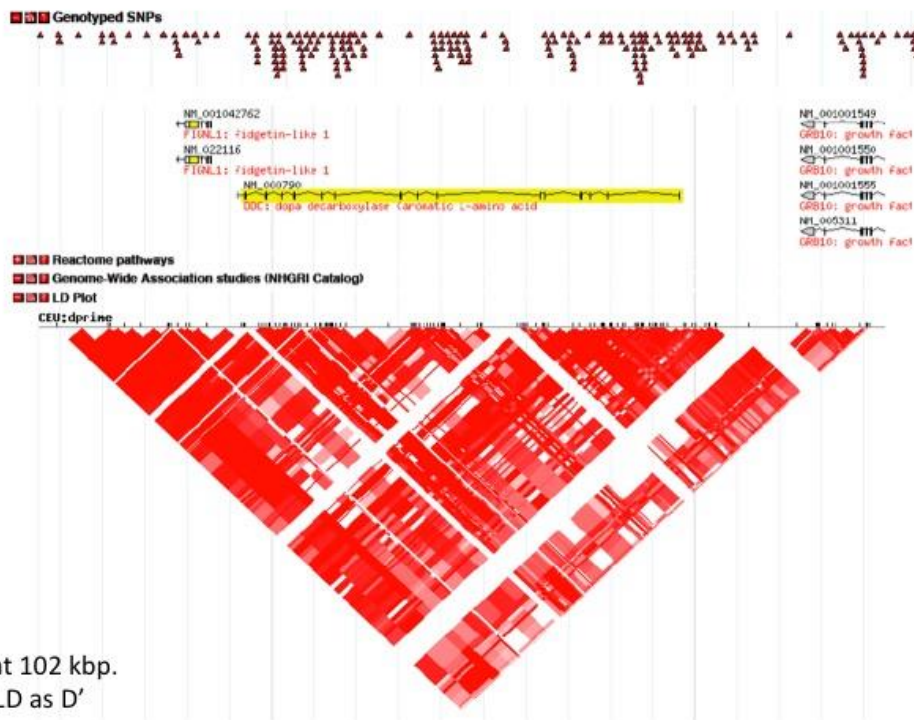

DDC at 102 kbp.  
CEU, LD as  $D'$

**Supplemental Figure 2. AFLP analysis of *DDC* variant Arg462Gln (rs11575542, G>A) . G/G: 482 bp; G/A: 482, 257, 225 bp; A/A: 257, 225 bp.**

***DDC* Arg462Gln by re-sequencing: Capillary tracings**

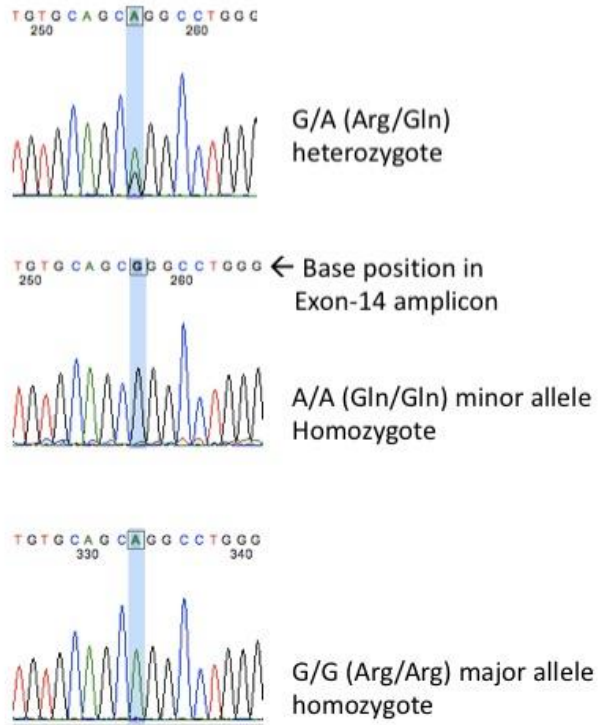

**Supplemental Figure 3. Trait aggregation of urine DA (uDA) excretion with biochemical and physiological phenotypes.** Results in upper and lower uDA quantiles (shown as mean  $\pm$  SEM) were analyzed by GEE in twins/siblings. Numbers are in parentheses (n) indicate the n for the observation. Significant differences ( $p < 0.05$ ) are **bold**.

**(3a).** Effects on the urine excretion of all three catecholamines: DA (uDA),  $p = 1.0E-06$ ; NE (uNE),  $p = 1.0E-06$ ; and EPI (uEpi),  $p = 1.0E-06$ .

**(3b).** Joint effects on urine  $\text{Na}^+$  excretion,  $p = 1.9E-02$ , and  $\text{FENa}^+$ ,  $p = 1.0E-06$ .

**(3c).** Joint effects on urine DA excretion (uDA),  $p = 1.0E-06$ , and eGFR,  $p = 9.0E-03$ .

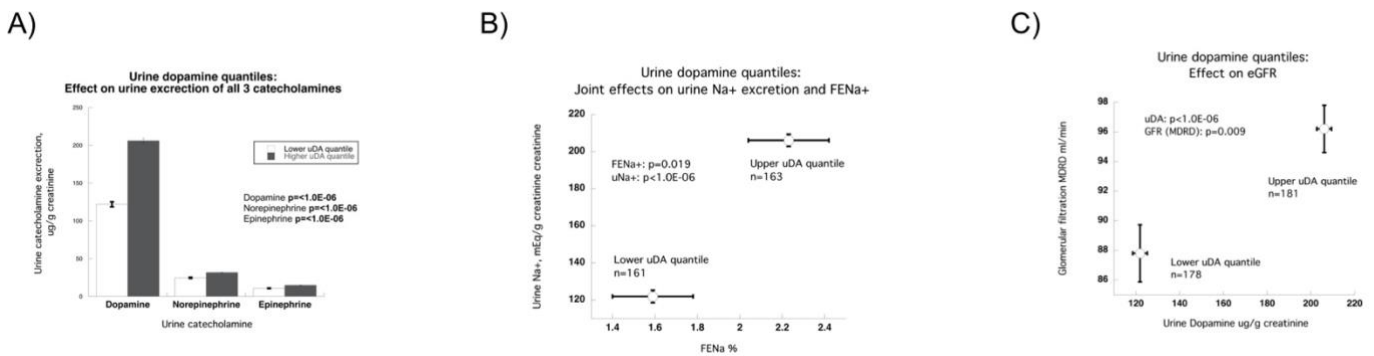

## Supplemental Tables

**Supporting Table 1: Replication of the effects of DOPA decarboxylase (DDC) tagging variants on renal dopamine excretion: Grouped analysis of 3 independent population groups.** Effects of *DDC* tagging variants rs115575385 (28 kb from peak tagging SNP for urine DA excretion, rs11575340) and rs11575522 (61 kb from peak tag SNP rs11575340) on urine DA excretion in three independent groups, analyzed with STATA. MRS indicates Marine Resiliency Study; DA/creat, DA excretion normalized to creatinine in the same urine sample. Significant ( $p < 0.05$ ) effects are given in **bold** type. During analyses, tests of potential heterogeneity of samples were positive for both rs11575386 ( $Q$  statistic = 12.9,  $df=2$ ,  $p=0.002$ ) and rs11575522 ( $Q=8.85$ ,  $df=2$ ,  $p=0.012$ ).

| Group          | DDC variant       | Alleles,<br>Minor/Major | Minor allele<br>frequency | N          | Trait                 | Beta (slope<br>per allele) | SE<br>(of beta) | P-value           |
|----------------|-------------------|-------------------------|---------------------------|------------|-----------------------|----------------------------|-----------------|-------------------|
| Twins/siblings | rs11575385        | T/C                     | 3.48%                     | 453        | Urine DA/creat        | -0.173                     | 0.030           |                   |
| Marines/MRS    | rs11575385        | A/G                     | 1.72%                     | 228        | Urine DA/creat        | 0.080                      | 0.064           |                   |
| Caregivers     | rs11575385        | A/G                     | 0.68%                     | 132        | Urine DA/creat        | -0.234                     | 0.317           |                   |
| <b>Result</b>  | <b>rs11575385</b> | <b>-</b>                | <b>-</b>                  | <b>813</b> | <b>Urine DA/creat</b> | <b>-0.129</b>              | <b>0.027</b>    | <b>&lt;0.0001</b> |
| Twins/siblings | rs11575522        | T/C                     | 2.90%                     | 453        | Urine DA/creat        | -0.16                      | 0.031           |                   |
| Marines/MRS    | rs11575522        | A/G                     | 2.16%                     | 229        | Urine DA/creat        | 0.040                      | 0.060           |                   |
| Caregivers     | rs11575522        | A/G                     | 1.37%                     | 132        | Urine DA/creat        | -0.1034                    | 0.226           |                   |
| <b>Result</b>  | <b>Rs11575522</b> | <b>-</b>                | <b>-</b>                  | <b>813</b> | <b>Urine DA/creat</b> | <b>-0.116</b>              | <b>0,028</b>    | <b>&lt;0.0001</b> |

**Table 2: DDC variant Arg462Gln conservation across species.** The Arg462Gln position is indicated by **red/bold type**. Species versions were identified by sequence homology at BLASTP <<http://blast.ncbi.nlm.nih.gov>>. Multiple sequence alignment was performed by Clustal Omega (1.1.0). Conservation legend: \* = fully conserved; : = conservation between groups of strongly similar properties (scoring >0.5 in Gonnet PAM 250 matrix), . = conservation between groups of weakly similar properties (scoring <0.5 in Gonnet PAM 250 matrix); blank = not conserved.

| <b>Primer number</b> | <b>Orientation</b> | <b>Sequence (5' → 3')</b> |
|----------------------|--------------------|---------------------------|
| DDC P1               | Sense              | ccctcactcttccccttacc      |
|                      | Anti-sense         | cccaaaccatcaaaatcat       |
| DDC P2               | Sense              | gccagaagaccagctccta       |
|                      | Anti-sense         | tctgggaatcctgagagcac      |
| DDC E1               | Sense              | tgggctccaaacttgaaatc      |
|                      | Anti-sense         | accacacaagctccctcaag      |
| DDC E2               | Sense              | tcctacagacatggagggaaa     |
|                      | Anti-sense         | tgccatagggattccttgaa      |
| DDC E3               | Sense              | aatgggatggctgacatttg      |
|                      | Anti-sense         | ctgcaacagtagcccgtct       |
| DDC E4               | Sense              | ttcaggcctttgaatcacatc     |
|                      | Anti-sense         | ccaagagctcgggttttgttt     |
| DDC E5               | Sense              | ggacacaaaacaatatgtcttcca  |
|                      | Anti-sense         | cacccttccctgtagttca       |
| DDC E6               | Sense              | ggagagggagcagtcaggag      |
|                      | Anti-sense         | tacaagaatgcgccaccat       |
| DDC E7               | Sense              | catccatgggcttacgtttc      |
|                      | Anti-sense         | tctgagtttgaggagttcaagc    |
| DDC E8               | Sense              | tttggggattcagccattag      |
|                      | Anti-sense         | aaggctctcagcccctattc      |
| DDC E9               | Sense              | ccagcactccagaagactcc      |
|                      | Anti-sense         | ggttcagaaaaggcagcaag      |
| DDC E10              | Sense              | cccaggtacttgagcagag       |
|                      | Anti-sense         | tacaagggcaaaccaggaa       |
| DDC E11              | Sense              | ctcgggacacacccttagaa      |
|                      | Anti-sense         | gactgaggggttcagcagag      |
| DDC E12              | Sense              | aagaaagcctctgcccacat      |
|                      | Anti-sense         | tgggggacaagagtgaaact      |
| DDC E13              | Sense              | cttagcctgcctggaaacag      |
|                      | Anti-sense         | aaagaatgcaggccttgctc      |
| DDC E14              | Sense              | ggcttcttctgatgtacgg       |
|                      | Anti-sense         | ccggccttctcttcttatt       |
| DDC E15              | Sense              | gagagggagagggacttcttta    |
|                      | Anti-sense         | tgccgtttaaacaatccaa       |
